# Supplementary material for: A facile biosynthesis strategy of plasmid DNA-derived nanowires for readable microRNA logic operations
Source: Royal Society of Chemistry journal article supplement (doi:10.1039/d1tb02699b), 2022-01-01
Supplement: d1tb02699b1.pdf [file d1tb02699b1.pdf]

## Supporting Information

### **A facile biosynthesis strategy of plasmid DNA-derived nanowire for readable microRNA logic operations**

Xue Yin,<sup>a,b</sup> Dongbao Yao,<sup>a</sup> Michael Hon-Wah Lam<sup>\*b</sup>, and Haojun Liang<sup>\*a</sup>

<sup>a</sup> School of Chemistry and Materials Science, Department of Polymer Science and Engineering, iChEM (Collaborative Innovation Center of Chemistry for Energy Materials), University of Science and Technology of China, Hefei, Anhui 230026, China. Email: [hjliang@ustc.edu.cn](mailto:hjliang@ustc.edu.cn)

<sup>b</sup> Department of Chemistry, City University of Hong Kong, Tat Chee Avenue, Kowloon, Hong Kong, China. Email: [bhmhwlam@cityu.edu.hk](mailto:bhmhwlam@cityu.edu.hk)

## **S1. Supplementary text**

### **S1.1 The length selection principle of nanowires**

In this work, the nanowires of various lengths were derived from plasmid DNA, and the gel electrophoresis was used to identify the nanowire substrates and their dimer conjugate according to the molecular sizes. So that the length of the nanowires could affect the experimental results. Based on these, the length selection principles of nanowires are stated as follows:

First, the candidate plasmid should contain a pair of restriction enzyme recognition sites at a suitable distance. After dual digestion, the 4-nt sticky ends are composed of different bases at both ends of the interested dsDNA fragment.

Second, the interested dsDNA fragment generated by dual digestion of plasmid should have enough length difference with the other piece of the uninterested fragment, so that they can be distinguished by gel electrophoresis during the purification procedure.

Third, as for multiple miRNA identification in Fig 4, each kind of substrate nanowire and nanowire conjugate complex generated by particular miRNA hybridization should have enough difference in length. So that the distribution of each nanowire or conjugate complex can be clearly distinguished by the position of the gel band.

## S2. Supplementary Figures

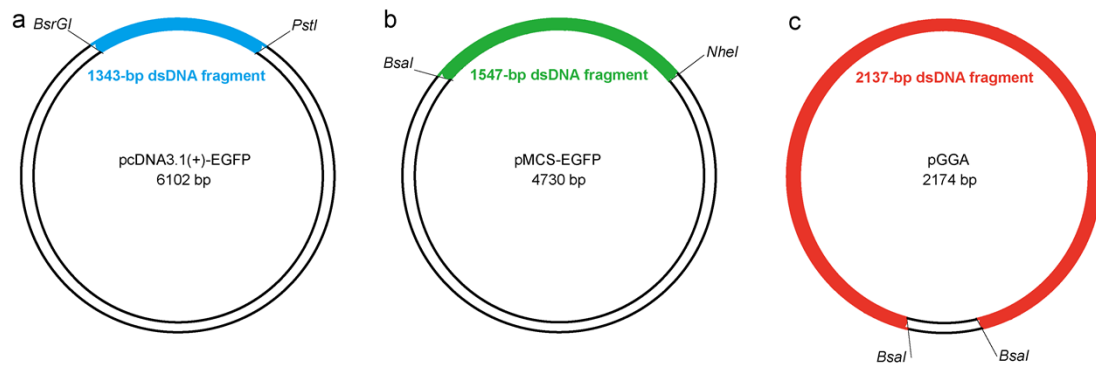

**Fig. S1.** Maps of plasmids. (a) pcDNA3.1(+)-EGFP can be digested by *PstI* and *BsrGI*, producing the 1343-bp dsDNA fragment A. (b) pCMV-EGFP can be digested by *BsaI* and *NheI*, producing the 1547-bp dsDNA fragment B. (c) pGGA can be digested by *BsaI*, producing 2137-bp dsDNA fragment C.

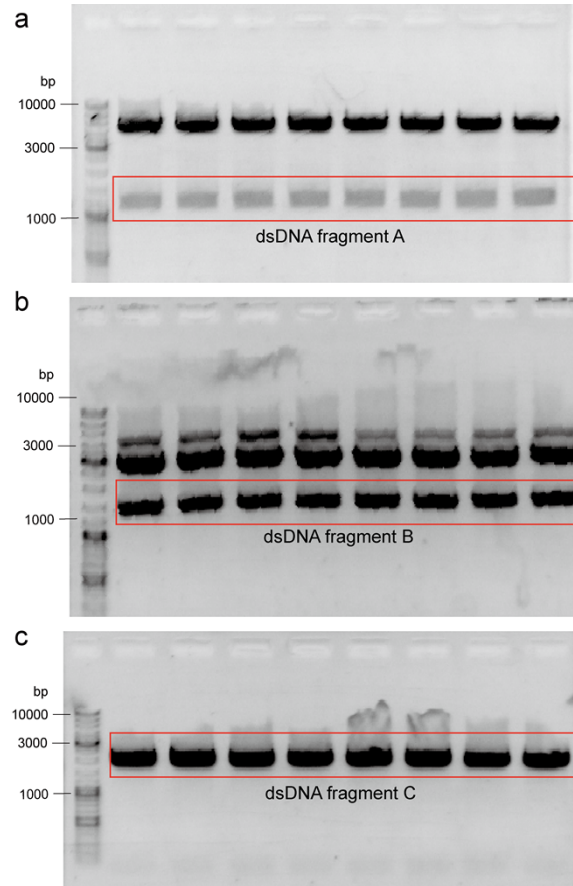

**Fig. S2.** Plasmid digested by corresponding restriction enzymes. (a) pcDNA3.1(+)-EGFP digested by *PstI* and *BsrGI*, the 1343-bp dsDNA fragment A was marked within the red rectangle. (b) pCMV-EGFP digested by *BsaI* and *NheI*, the 1547-bp dsDNA fragment B marked in the red rectangle. (c) pGGA digested by *BsaI*, the 2137-bp dsDNA fragment C marked within the red rectangle. DNA marker is the 1 kb ladder.

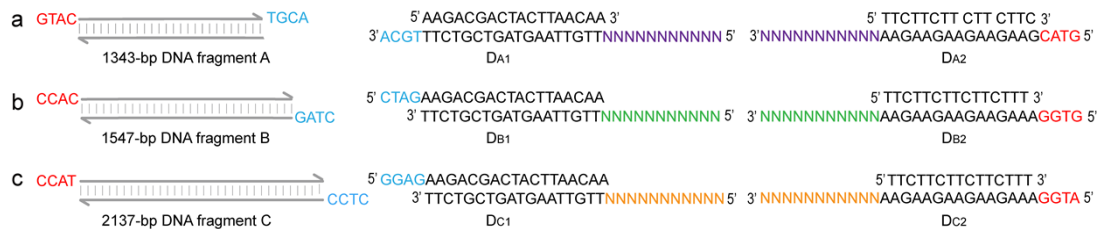

**Fig. S3.** Sequences of dsDNA fragment with different lengths and pairs of oligo duplexes of (a)  $D_{A1}$ , and  $D_{A2}$ ; (b)  $D_{B1}$ , and  $D_{B2}$ ; and (c)  $D_{C1}$ , and  $D_{C2}$ .

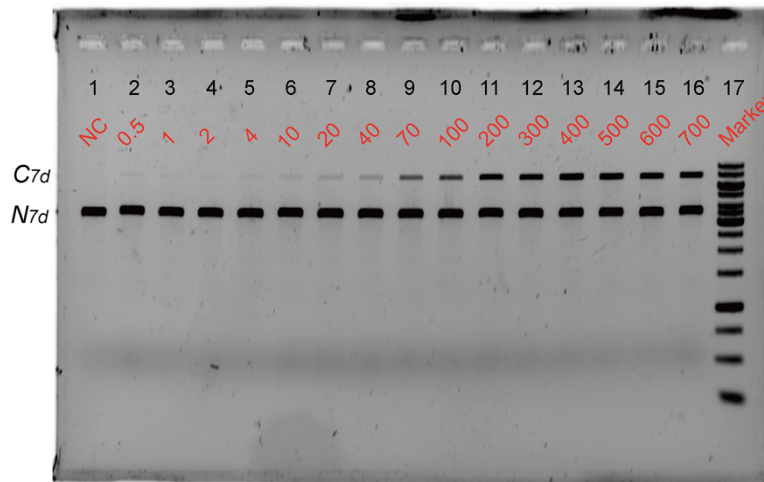

**Fig. S4.** Intact agarose gel imaging for various concentrations of let-7d ranges from 0.5 to 700 pM. Lane 1 was nanowire pairs without any target. Lane 17 was a 1 kb DNA ladder. Other lanes were target presences at various concentrations ranging from 0.5 to 700 pM (lane 2 to 16: 0.5, 1, 2, 4, 10, 20, 40, 70, 100, 200, 300, 400, 500, 600, and 700 pM).

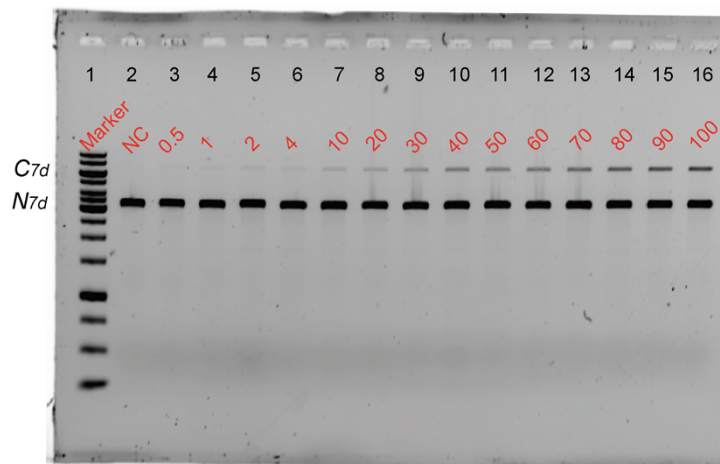

**Fig. S5.** Intact agarose gel imaging for various concentrations of let-7d range from 0 to 100 pM. Lane 1 was a 1 kb DNA ladder. Lane 2 was nanowire pairs without any target, other lanes were target presences at various concentrations ranging from 0.5 to 100 pM (lane 3 to 16: 0.5, 1, 2, 4, 10, 20, 30, 40, 50, 60, 70, 80, 90, and 100 pM).

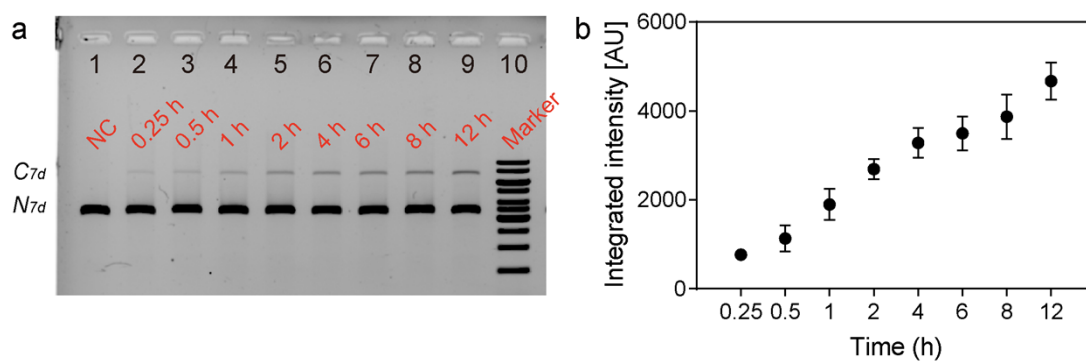

**Fig. S6.** Influence of incubation time for the nanowire-based strategy for let-7d response. (a) Image of agarose gel readout of 100 pM let-7d incubated with 300 pM of  $N_{7d-1}$  and  $N_{7d-2}$  at different times. Lane 1, negative control (NC); lane 2 to 9: 0.25, 0.5, 1, 2, 4, 6, 8, 12 h; lane 10, 1 kb DNA ladder. (b) Plots of the corresponding  $C_{7d}$  band intensities changed with the incubation time.

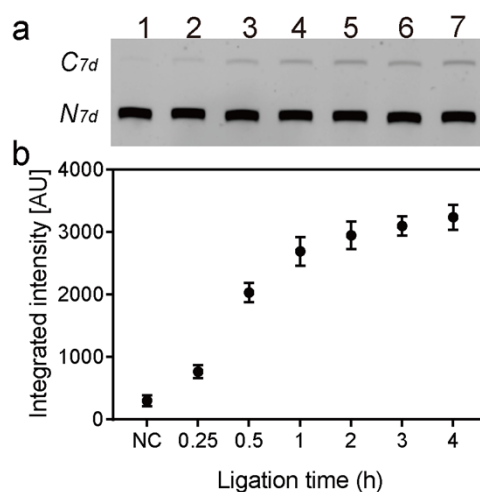

**Fig. S7.** Influence of ligation time of the nanowire-based strategy. (a) Image of agarose gel readout by the let-7d response with nanowires generated by different ligation time at 16 °C. The 300 pM of  $N_{7d-1}$  and  $N_{7d-2}$  generated by different ligation times interacted with 100 pM let-7d for 4 h at room temperature. NC, negative control with no T4 ligase treatment. Lane 2-7 represents 0.25, 0.5, 1, 2, 3, 4 h. (b) Plots of the corresponding  $C_{7d}$  band intensities changed with the ligation time.

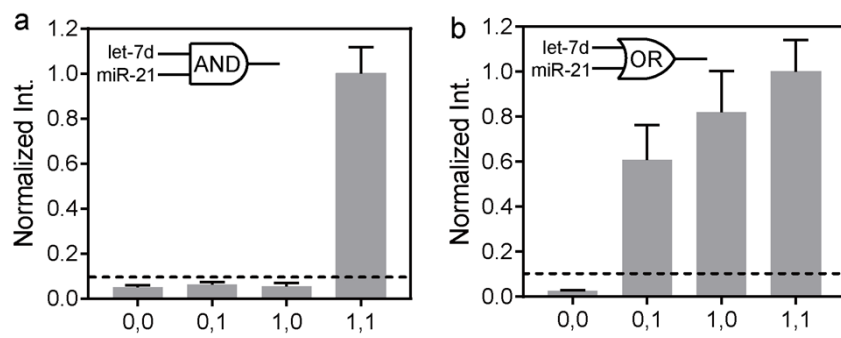

**Fig. S8.** Normalized gel band intensity of nanowire conjugate complexes of logic gates. (a) The AND gate. (b) The OR gate. The dotted lines represent the normalized gel band intensity threshold value.

### S3. Supplementary Tables

| Name        | Sequence (5' to 3')                 |
|-------------|-------------------------------------|
| let-7d      | AGAGGUAGUAGGUUGCAUAGUU              |
| let-7a      | UGAGGUAGUAGGUUGUAUAGUU              |
| let-7b      | UGAGGUAGUAGGUUGUAUAGUU              |
| let-7c      | UGAGGUAGUAGGUUGUAUAGUU              |
| let-7i      | UGAGGUAGUAGUUUGUGCUGUU              |
| miR-21      | UAGCUUAUCAGACUGAUGUUGA              |
| miR-224     | UCAAGUCACUAGUGGUUCCGUUUAG           |
| C-U1        | p-GGAGAAGACGACTACTTAACAA            |
| U2          | TTCTTCTTCTTCTTT                     |
| C-let7d-L1  | CTACTACCTCTTTGTTAAGTAGTCGTCTT       |
| C-let7d-L2  | p-ATGGAAAGAAGAAGAAGAAACTATGCAAC     |
| C-miR21-L1  | CTGATAAGCTATTGTTAAGTAGTCGTCTT       |
| C-miR21-L2  | p-ATGGAAAGAAGAAGAAGAATCAACATCAGT    |
| Helper DNA  | AACTATGCAACCTGATAAGCTA              |
| A-U1        | p-AAGACGACTACTTAACAA                |
| A-miR224-L1 | ACTAGTGACTTGATTGTTAAGTAGTCGTCTTTGCA |
| A-U2        | TTCTTCTTCTTCTTC                     |
| A-miR224-L2 | p-GTACGAAGAAGAAGAAGAACTAAACGGAACCA  |
| B-U1        | p-CTAGAAGACGACTACTTAACAA            |
| B-miR21-L1  | CTGATAAGCTATTGTTAAGTAGTCGTCTT       |
| B-miR21-L2  | p-CTGGAAAGAAGAAGAAGAATCAACATCAGT    |

**Table S1.** miRNA and DNA sequences used in this work.



| <b>The sequence of dsDNA fragment A (5' to 3'; 1343 bp)</b>                                                                                                                                                                                                                                                                                                                                                                                                                                                                                                                                                                                                                                                                                                                                                                                                                                                                                                                                                                                                                                                                                                                                                                                                                                                                                                                                                                                                                                                                                      |
|--------------------------------------------------------------------------------------------------------------------------------------------------------------------------------------------------------------------------------------------------------------------------------------------------------------------------------------------------------------------------------------------------------------------------------------------------------------------------------------------------------------------------------------------------------------------------------------------------------------------------------------------------------------------------------------------------------------------------------------------------------------------------------------------------------------------------------------------------------------------------------------------------------------------------------------------------------------------------------------------------------------------------------------------------------------------------------------------------------------------------------------------------------------------------------------------------------------------------------------------------------------------------------------------------------------------------------------------------------------------------------------------------------------------------------------------------------------------------------------------------------------------------------------------------|
| <p> <u>GTACAAGGAATTCTAATCTAGAGGGCCCGTTTAAACCCGCTGATCAGCCTCGACTGTG</u><br/> CCTTCTAGTTGCCAGCCATCTGTTGTTTGCCCCTCCCCGTGCCTTCCTTGACCCTGGAA<br/> GGTGCCACTCCCCTGTCCTTTTCTAATAAAAATGAGGAAATTGCATCGCATTGCTGAG<br/> TAGGTGTCATTCTATTCTGGGGGGTGGGGTGGGGCAGGACAGCAAGGGGGAGGATTG<br/> GGAAGACAATAGCAGGCATGCTGGGGATGCGGTGGGCTCTATGGCTTCTGAGGCGGA<br/> AAGAACCAGCTGGGGCTCTAGGGGGTATCCCCACGCGCCCTGTAGCGGCATTAAGC<br/> GCGGCGGGTGTGGTGGTTACGCGCAGCGTGACCGCTACACTTGCCAGCGCCCTAGCGC<br/> CCGCTCCTTTCGCTTCTTCCCTTCCTTCTCGCCACGTTCCGCCGGCTTTCCCCGTCAAG<br/> CTCTAAATCGGGGGCTCCCTTTAGGGTTCGATTTAGTGCTTTACGGCACCTCGACCCC<br/> AAAAAATTGATTAGGGTGATGGTTCACGTAGTGGGCCATCGCCCTGATAGACGGTTT<br/> TTCGCCCTTTGACGTTGGAGTCCACGTTCTTTAATAGTGGACTCTTGTTCCAAACTGGA<br/> ACAACACTCAACCCTATCTCGGTCTATTCTTTTGATTATAAGGGATTTTGCCGATTTTCG<br/> GCCTATTGGTTAAAAAATGAGCTGATTTAACAAAAATTTAACGCGAATTAATTCTGTG<br/> GAATGTGTGTCAGTTAGGGTGTGGAAAGTCCCCAGGCTCCCCAGCAGGCAGAAGTATG<br/> CAAAGCATGCATCTCAATTAGTCAGCAACCAGGTGTGGAAAGTCCCCAGGCTCCCCAG<br/> CAGGCAGAAGTATGCAAAGCATGCATCTCAATTAGTCAGCAACCATAGTCCCCGCCCT<br/> AACTCCGCCATCCCGCCCCTAACTCCGCCAGTTCGCCCCATTCTCCGCCCATGGCT<br/> GACTAATTTTTTTTATTTATGCAGAGGCCGAGGCCGCCTCTGCCTCTGAGCTATTCCAG<br/> AAGTAGTGAGGAGGCTTTTTTGGAGGCCTAGGCTTTTGCAAAAAGCTCCCGGGAGCTT<br/> GTATATCCATTTTCGGATCTGATCAAGAGACAGGATGAGGATCGTTTCGCATGATTGA<br/> ACAAGATGGATTGCACGCAGGTTCTCCGGCCGCTTGGGTGGAGAGGCTATTCCGCTAT<br/> GACTGGGCACAACAGACAATCGGCTGCTCTGATGCCGCCGTGTTCCGGCTGTCAGCGC<br/> AGGGGCGCCCGGTTCTTTTTGTCAAGACCGACCTGTCCGGTGCCCTGAATGA<u>ACTGCA</u> </p> |

**Table S2.** The sequence of the 1343-bp dsDNA fragment A obtained from pcDNA 3.1+EGFP plasmid. The 4-nt sticky ends obtained by *PstI* and *BsrGI* digestion were underlined.

| <b>The sequence of dsDNA fragment B (5' to 3'; 1547 bp)</b>                                                                                                                                                                                                                                                                                                                                                                                                                                                                                                                                                                                                                                                                                                                                                                                                                                                                                                                                                                                                                                                                                                                                                                                                                                                                                                                                                                                                                                                                                                                                                                                                                                                                                                                                                        |
|--------------------------------------------------------------------------------------------------------------------------------------------------------------------------------------------------------------------------------------------------------------------------------------------------------------------------------------------------------------------------------------------------------------------------------------------------------------------------------------------------------------------------------------------------------------------------------------------------------------------------------------------------------------------------------------------------------------------------------------------------------------------------------------------------------------------------------------------------------------------------------------------------------------------------------------------------------------------------------------------------------------------------------------------------------------------------------------------------------------------------------------------------------------------------------------------------------------------------------------------------------------------------------------------------------------------------------------------------------------------------------------------------------------------------------------------------------------------------------------------------------------------------------------------------------------------------------------------------------------------------------------------------------------------------------------------------------------------------------------------------------------------------------------------------------------------|
| <p> <u>CCACCGAGACCC</u>ATTGGGGCCAATACGCCC<u>CGGTTTCTTCCTTTTCCCACCCACCC</u><br/> CCCAAGTTCGGGTGAAGGCCAGGGCTCGCAGCCAACGTCGGGGCGGCAGGCCCTGC<br/> CATAGCCTCAGGTTACTCATATATACTTTAGATTGATTTAAAACCTTCATTTTTAATTTAA<br/> AAGGATCTAGGTGAAGATCCTTTTTGATAATCTCATGACCAAAATCCCTTAACGTGAGT<br/> TTTCGTTCCACTGAGCGTCAGACCCCGTAGAAAAGATCAAAGGATCTTCTTGAGATCCT<br/> TTTTTTCTGCGGTAATCTGCTGCTTGCAAACAAAAAAACCACCGCTACCAGCGGTGGT<br/> TTGTTTGCCGGATCAAGAGCTACCAACTCTTTTTCCGAAGGTAAGTGGCTTCAGCAGAG<br/> CGCAGATACCAAATACTGTTCTTCTAGTGTAGCCGTAGTTAGGCCACCACTTCAAGAA<br/> CTCTGTAGCACCCGCTACATACTCGCTCTGCTAATCCTGTTACCAGTGGCTGCTGCCA<br/> GTGGCGATAAGTCGTGTCTTACCGGGTTGGACTCAAGACGATAGTTACCGGATAAGGC<br/> GCAGCGGTCGGGCTGAACGGGGGGTTCGTGCACACAGCCCAGCTTGGAGCGAACGAC<br/> CTACACCGAACTGAGATACCTACAGCGTGAGCTATGAGAAAGCGCCACGCTTCCCAGAA<br/> GGGAGAAAGGCGGACAGGTATCCGGTAAGCGGCAGGGTCGGAACAGGAGAGCGCAC<br/> GAGGGAGCTTCCAGGGGGAAACGCCTGGTATCTTTATAGTCCTGTCTGGGTTTCGCCAC<br/> CTCTGACTTGAGCGTCGATTTTTGTGATGCTCGTCAGGGGGCGGAGCCTATGGAAAA<br/> ACGCCAGCAACGCGGCCTTTTTACGGTTCCTGGCCTTTTGCTGGCCTTTTGCTCACATG<br/> TTCTTTCCTGCGTTATCCCCTGATTCTGTGGATAACCGTATTACCGCCATGCATTAGTTA<br/> TTAATAGTAATCAATTACGGGGTCATTAGTTCATAGCCCATATATGGAGTTCGCGGTTA<br/> CATAACTTACGGTAAATGGCCCGCCTGGCTGACCGCCAACGACCCCCGCCATTGAC<br/> GTCAATAATGACGTATGTTCCCATAGTAACGCCAATAGGGACTTTCATTGACGTCAAT<br/> GGGTGGAGTATTTACGGTAAACTGCCCACTTGGCAGTACATCAAGTGTATCATATGCC<br/> AAGTACGCCCCCTATTGACGTCAATGACGGTAAATGGCCCGCCTGGCATTATGCCCAG<br/> TACATGACCTTATGGGACTTTCTACTTGGCAGTACATCTACGTATTAGTCATCGCTAT<br/> TACCATGGTGATGCGGTTTTGGCAGTACATCAATGGGCGTGGATAGCGGTTTACTCA<br/> CGGGGATTTCCAAGTCTCACCCCAATTGACGTCAATGGGAGTTTGTGTTTGGCACCAAAA<br/> TCAACGGGACTTTCCAAAATGTCGTAACAACCTCCGCCCCATTGACGCAAATGGGCGGT<br/> AGGCGTGTACGGTGGGAGGTCTATATAAGCAGAGCTGGTTTAGTGAACCGGCTAG </p> |

**Table S3.** The sequence of the 1547-bp dsDNA fragment B obtained from pMCS-EGFP plasmid. The 4-nt sticky ends obtained by *BsaI* and *NheI* digestion are underlined.

| <b>The sequence of dsDNA fragment C (5' to 3'; 2137 bp)</b>                                                                                                                                                                                                                                                                                                                                                                                                                                                                                                                                                                                                                                                                                                                                                                                                                                                                                                                                                                                                                                                                                                                                                                                                                                                                                                                                                                                                                                                                                                                                                                                                                                                                                                                                                                                                                                                                                                                                                                                                                                                                                                                                                                                                                                                                                                                                                                                                 |
|-------------------------------------------------------------------------------------------------------------------------------------------------------------------------------------------------------------------------------------------------------------------------------------------------------------------------------------------------------------------------------------------------------------------------------------------------------------------------------------------------------------------------------------------------------------------------------------------------------------------------------------------------------------------------------------------------------------------------------------------------------------------------------------------------------------------------------------------------------------------------------------------------------------------------------------------------------------------------------------------------------------------------------------------------------------------------------------------------------------------------------------------------------------------------------------------------------------------------------------------------------------------------------------------------------------------------------------------------------------------------------------------------------------------------------------------------------------------------------------------------------------------------------------------------------------------------------------------------------------------------------------------------------------------------------------------------------------------------------------------------------------------------------------------------------------------------------------------------------------------------------------------------------------------------------------------------------------------------------------------------------------------------------------------------------------------------------------------------------------------------------------------------------------------------------------------------------------------------------------------------------------------------------------------------------------------------------------------------------------------------------------------------------------------------------------------------------------|
| <p> <u>CCATTCCTGTAGTCTTCTTAATTAAGACGTCAGAATTCTCGAGGCGGCCGCATGTGCGT</u><br/> CTCCCTATAGTGAGTCGTATTAATTTTCGCGGGCGGAACCCCTATTTGTTTATTTTTCTAA<br/> ATACATTCAAATATGTATCCGCTCATGAGTAGCACCAGGCGTTTAAGGGCACCAATAA<br/> CTGCCTTAAAAAATTACGCCCCGCCCTGCCACTCATCGCAGTACTGTTGTAATTCATT<br/> AAGCATTCTGCCGACATGGAAGCCATCACAAACGGCATGATGAACCTGAATCGCCAGC<br/> GGCATCAGCACCTTGTGCGCTTTCGTATAATATTTGCCCATGGTGAAAACGGGGGCGA<br/> AGAAGTTGTCCATATTGGCCACGTTTAAATCAAACCTGGTGAAACTCACCCAGGGATT<br/> GGCTGAGACGAAAAACATATTCTCAATAAACCCTTTAGGGAAATAGGCCAGGTTTTCA<br/> CCGTAACACGCCACATCTTGCGAATATATGTGTAGAAACTGCCGGAATCGTCGTGGT<br/> ATTCACTCCAGAGCGATGAAAACGTTTCAGTTTGCTCATGGAAAACGGGTGTAACAAGG<br/> GTGAACACTATCCCATATCACCAGCTCACCGTCTTTCATTGCCATACGGAATTCCGGAT<br/> GAGCATTTCATCAGGCGGGCAAGAATGTGAATAAAGGCCGGATAAAACTTGTGCTTATT<br/> TTTTCTTACGGTCTTTAAAAAGGCCGTAATATCCAGCTGAACGGTCTGGTTATAGGTAC<br/> ATTGAGCAACTGACTGAAATGCCTCAAATGTTCTTTACGATGCCATTGGGATATATCA<br/> ACGGTGGTATATCCAGTGATTTTTTTCTCCATTTTAGCTTCCTTAGCTCCTGAAAATCTC<br/> GATAACTCAAAAAATACGCCCGGTAGTGATCTTATTTTCATTATGGTGAAAGTTGGAAC<br/> CTCTTACGTGCCGATCAACGTCTCATTTCGCCAAAAGTTGTCATGACCAAAATCCCTT<br/> AACGTGAGTTTTTCGTTCCACTGAGCGTCAGACCCCGTAGAAAAGATCAAAGGATCTTC<br/> TTGAGATCCTTTTTTCTGCGCGTAATCTGCTGCTTGCAAACAAAAAAACCACCGCTAC<br/> CAGCGGTGGTTTTGTTTCCGGATCAAGAGCTACCAACTCTTTTTCCGAAGGTAAGTGGC<br/> TTCAGCAGAGCGCAGATACCAAATACTGTTCTTCTAGTGTAGCCGTAGTTAGGCCACC<br/> ACTTCAAGAACTCTGTAGCACCGCCTACATACCTCGCTCTGCTAATCCTGTTACCAGTG<br/> GCTGCTGCCAGTGGCGATAAGTCGTGTCTTACCGGGTTGGACTCAAGACGATAGTTAC<br/> CGGATAAGGCGCAGCGGTCGGGCTGAACGGGGGGTTCGTGCACACAGCCCAGCTTGG<br/> AGCGAACGACCTACCCGAACCTGAGATACCTACAGCGTGAGCTATGAGAAAGCGCCA<br/> CGCTTCCCGAAGGGAGAAAGGCGGACAGGTATCCGGTAAGCGGCAGGGTCGGAACAG<br/> GAGAGCGCACGAGGGAGCTTCCAGGGGAAACGCCTGGTATCTTTATAGTCCGTGTCGG<br/> GTTTCGCCACCTCTGACTTGAGCGTCGATTTTTGTGATGCTCGTCAGGGGGGCGGAGCC<br/> TATGGAAAACGCCAGCAATGCGGCCTTTTTACGGTTCCTGGCCTTTTGCTGGCCTTTT<br/> GCTCACATGTTCTTCTGCGTTATCCCTGATTCTGTGGATAACCGTATTACCGCCTTT<br/> GAGTGAGCTGATACCGCTCGCCGACGCCGAACGACCGAGCGCAGCGAGTCAGTGAGC<br/> GAGGAAGCCGAAAAATCAATAATCAGACAACAAGATGTGCGAACTCGATATTTTACA<br/> CGACTCTCTTTACCAATTCTGCCCGAATTACACTTAAAACGACTCAACAGCTTAACGT<br/> TGGCTTGCCACGCATTACTIONGACTGTAAAACCTCACTCTTACCGAACTTGGCCGTAAC<br/> CTGCCAACCAAAGCGAGAACAACATAACATCAAACGAATCGACCGATTGTTAGGT<br/> AATCGTCACCTGCAGGAAGGTTTAAACGCATTTAGGTGACACTATAGAAGTGTGTATC<br/> GCTCGAGGGATCCGAATTCGAAGACTTGGTACGGAG </p> |

**Table S4.** The sequence of the 2137-bp dsDNA fragment C obtained from pGGA plasmid. The 4-nt sticky ends obtained by *BsaI* digestion are underlined.

| <b>Technique</b>    | <b>Strategy</b>           | <b>Sensitivity</b> | <b>Advantages</b>                            | <b>Ref.</b> |
|---------------------|---------------------------|--------------------|----------------------------------------------|-------------|
| Fluorescence        | GO, AgNCs                 | 0.31 nM            | Label-free, high selectivity                 | 1           |
| CERT                | CHA, HCR                  | 0.72 pM            | Enzyme-free, high sensitivity                | 2           |
| FRET                | HCR                       | 76 pM              | Isothermal, enzyme-free                      | 3           |
| SPR                 | Hairpin stacking circuits | 1.5 pM             | Decreased background noise, high sensitivity | 4           |
| Colorimetry         | SDR, HCR                  | 1 pM               | Enzyme-free, good specificity                | 5           |
| Colorimetry         | AuNPs, HCR                | 23 pM              | Label-free                                   | 6           |
| Colorimetry         | AuNPs, CHA                | 5 pM               | Label-free                                   | 7           |
| Gel electrophoresis | DNA-RNA hybridization     | 3 pM               | Label-free, amplification-free, low cost     | This work   |

\*GO, Graphene oxide; AgNCs, silver nanoclusters; CERT, chemiluminescence resonance energy transfer; CHA, catalyzed hairpin assembly; HCR, hybridization chain reaction; FRET, fluorescence resonance energy transfer; SPR, surface plasmon resonance; SDR, strand displacement reaction; AuNPs, gold nanoparticles.

**Table S5.** Comparison of sensitivity and advantages of proposed strategy with some representative miRNA logic systems.

## References

1. S. Zhang, W. Shi, K.-B. Li, F. Chen, J. Su and D.-M. Han, *Sens. Actuators B Chem.*, 2018, **273**, 408-417.
2. S. Bi, S. Yue, Q. Wu and J. Ye, *ChemComm*, 2016, **52**, 5455-5458.
3. X. Gong, J. Wei, J. Liu, R. Li, X. Liu and F. Wang, *Chem. Sci.*, 2019, **10**, 2989-2997.
4. Y. Xing, X. Li, T. Yuan, W. Cheng, D. Li, T. Yu, X. Ding and S. Ding, *Analyst*, 2017, **142**, 4834-4842.
5. X. Ma, L. Gao, Y. Tang and P. Miao, *Part Part Syst Charact*, 2018, **35**, 1700326.
6. X. Ma, X. Chen, Y. Tang, R. Yan and P. Miao, *ACS Appl. Mater. Interfaces*, 2019, **11**, 41157-41164.
7. A. Ebrahimi, H. Ravan and M. Mehrabani, *Biosens. Bioelectron.*, 2020, **170**, 112710.
